# Supplementary material for: Association between Obesity and Intake of Different Food Groups among Japanese with Type 2 Diabetes Mellitus—Japan Diabetes Clinical Data Management Study (JDDM68)
Source: MDPI journal article supplement (doi:10.3390/nu14153034), 2022-07-24
Supplement: s1 [file s1]

## Supplementary materials

**Supplementary Table S1. Characteristics of participants between under 65 and over 65 age by sex.**

|                                             | men        |            |        |             |            |        | women      |            |        |            |            |        |
|---------------------------------------------|------------|------------|--------|-------------|------------|--------|------------|------------|--------|------------|------------|--------|
|                                             | <65years   |            |        | ≥65years    |            |        | <65years   |            |        | ≥65years   |            |        |
|                                             | BMI<25     | BMI≥25     | p      | BMI<25      | BMI≥25     | p      | BMI<25     | BMI≥25     | p      | BMI<25     | BMI≥25     | p      |
|                                             | (n=294)    | (n=465)    |        | (n=331)     | (n=190)    |        | (n=144)    | (n=224)    |        | (n=256)    | (n=166)    |        |
| Age (years)                                 | 55.7±7.0   | 51.5±8.2   | <0.001 | 72.6±5.6    | 71.5±5.8   | 0.011  | 56.5±7.7   | 51.6±10.9  | <0.001 | 74±6.1     | 72.6±5.6   | 0.044  |
| BMI (kg/m <sup>2</sup> )                    | 22.5±1.8   | 29.4±3.9   | <0.001 | 22.3±1.8    | 27.5±2.2   | <0.001 | 21.5±2.3   | 30.5±4.6   | <0.001 | 21.8±2.2   | 28.5±3.3   | <0.001 |
| Duration of diabetes (years)                | 9.8±6.8    | 9.4±6.2    | <0.001 | 15.4±8.5    | 13.6±8.1   | 0.022  | 9.0±6.4    | 9.4±6.6    | 0.596  | 14.3±8.7   | 13.4±7.8   | 0.284  |
| Systolic blood pressure (mmHg)              | 125±15     | 128±15     | 0.035  | 127±15      | 130±14     | 0.155  | 124±18     | 124±13     | 0.993  | 128±17     | 129±15     | 0.578  |
| LDL cholesterol (mg/dl)                     | 112±28     | 107±29     | 0.052  | 105±23      | 99±25      | 0.298  | 122±38     | 108±28     | 0.053  | 113±34     | 106±27     | 0.281  |
| HDL cholesterol (mg/dl)                     | 56±16      | 49±12      | <0.001 | 57±17       | 51±15      | 0.003  | 69±17      | 58±15      | <0.001 | 63±16      | 56±13      | 0.001  |
| Triglycerides (mg/dl)                       | 174±148    | 200±179    | 0.015  | 139±109     | 172±89     | <0.001 | 130±92     | 171±121    | <0.001 | 135±76     | 160±75     | 0.001  |
| HbA1c (%)                                   | 7.2±1.3    | 7.5±1.3    | <0.001 | 6.9±0.7     | 7.1±0.8    | 0.006  | 7.4±1.3    | 7.4±1.3    | 0.928  | 7.1±0.9    | 7.2±0.9    | 0.164  |
| Current smoking (%)                         | 31.0       | 31.8       | 0.673  | 16.6        | 13.2       | 0.071  | 10.4       | 12.5       | 0.53   | 2.7        | 6.0        | 0.164  |
| Drinking alcohol (%)                        | 67.3       | 55.3       | 0.001  | 60.1        | 61.1       | 0.834  | 31.3       | 30.4       | 0.856  | 22.7       | 17.5       | 0.198  |
| Energy intake (kcal)                        | 1821±413   | 1854±484   | 0.696  | 1813±435    | 1883±452   | 0.083  | 1666±341   | 1714.6±428 | 0.226  | 1692±330   | 1644±360   | 0.135  |
| Protein (% energy)                          | 14.8±2.5   | 14.2±2.2   | 0.013  | 14.9±1.9    | 15.0±2.3   | 0.866  | 15.2±2.2   | 14.7±2.1   | 0.028  | 16.0±1.9   | 15.2±1.9   | <0.001 |
| Fat (% energy)                              | 29.6±5.7   | 30.3±6     | 0.023  | 28.1±4.9    | 28.4±4.8   | 0.558  | 31.1±5.9   | 31.8±5.0   | 0.251  | 29.3±4.1   | 28.8±4.4   | 0.249  |
| Carbohydrate (% energy)                     | 55.7±7.1   | 55.5±7.4   | 0.256  | 56.9±6      | 56.6±6.1   | 0.576  | 53.7±7.0   | 53.5±6.0   | 0.843  | 54.7±4.9   | 56±5.5     | 0.013  |
| Treated by OHA and/or GLP-1RA (%)           | 79.8       | 78.3       | 0.639  | 74.3        | 82.6       | 0.045  | 74.1       | 79.3       | 0.294  | 74.6       | 83.6       | 0.051  |
| Treated by insulin (%)                      | 21.0       | 23.5       | 0.474  | 27.7        | 35.9       | 0.076  | 25.9       | 27.8       | 0.720  | 31.9       | 35         | 0.556  |
| Physical activity (METs · h/w) <sup>†</sup> | 16.5       | 11.6       | <0.001 | 23.1        | 19.0       | 0.078  | 17.1       | 11.9       | 0.025  | 13.2       | 11.4       | 0.139  |
|                                             | (7.1-40.5) | (4.0-27.4) |        | (11.0-46.2) | (6.6-43.8) |        | (6.6-31.0) | (4.1-26.6) |        | (6.6-23.2) | (3.9-26.8) |        |

Data are mean ± standard deviation or n (%). <sup>†</sup> Physical activity (metabolic equivalents [METs] · h/w) are median. Differences in the continuous and categorical variables were analyzed by Student's t test or Mann-Whitney U tests and chi-square ( $\chi^2$ ) tests, respectively.

BMI, body mass index; LDL-cholesterol, low-density lipoprotein cholesterol; HDL-cholesterol, high-density lipoprotein cholesterol; OHA, oral hypoglycemic agent; GLP-1RA, GLP-1 receptor agonist

**Supplementary Table S2. Food groups stratified and obesity status between under 65 and over 65 age by sex.**

|                               | men       |           |        |           |          |        | women    |           |        |           |           |        |
|-------------------------------|-----------|-----------|--------|-----------|----------|--------|----------|-----------|--------|-----------|-----------|--------|
|                               | <65years  |           |        | ≥65years  |          |        | <65years |           |        | ≥65years  |           |        |
|                               | BMI<25    | BMI≥25    | p      | BMI<25    | BMI≥25   | p      | BMI<25   | BMI≥25    | p      | BMI<25    | BMI≥25    | p      |
|                               | (n=294)   | (n=465)   |        | (n=331)   | (n=190)  |        | (n=144)  | (n=224)   |        | (n=256)   | (n=166)   |        |
| Grains (g)                    | 376±128   | 388±127   | 0.454  | 367±111   | 362±115  | 0.911  | 325±92   | 328±92    | 0.631  | 325±78    | 336±87    | 0.057  |
| Rice (g)                      | 273±136   | 288±132   | 0.113  | 254±114   | 248±114  | 0.979  | 235±109  | 232±103   | 0.829  | 231±89    | 245±107   | 0.074  |
| Bread (g)                     | 35±37     | 32±34     | 0.332  | 43±35     | 39±44    | 0.044  | 41±32    | 37±31     | 0.145  | 39±30     | 34±28     | 0.099  |
| Noodles (g)                   | 68±58     | 67±58     | 0.764  | 70±59     | 75±63    | 0.203  | 49±48    | 59±54     | 0.103  | 54±49     | 57±47     | 0.487  |
| Potato (g)                    | 22±25     | 21±21     | 0.530  | 29±27     | 30±31    | 0.696  | 25±22    | 28±26     | 0.783  | 42±32     | 37±29     | 0.187  |
| Total vegetables (g)          | 222±108   | 196±107   | <0.001 | 248±120   | 226±110  | 0.066  | 274±115  | 233±114   | <0.001 | 278±106   | 247±118   | 0.002  |
| Green-yellow vegetables (g)   | 75±43     | 64±41     | <0.001 | 87±46     | 77±44    | 0.029  | 97±49    | 80±45     | <0.001 | 99±43     | 86±48     | <0.001 |
| Other vegetables (g)          | 147±75    | 132±77    | 0.002  | 161±82    | 148±74   | 0.151  | 177±77   | 153±79    | 0.002  | 179±71    | 162±79    | 0.008  |
| Fruits (g)                    | 63±60     | 54±65     | 0.008  | 105±68    | 104±80   | 0.453  | 84±64    | 74±67     | 0.090  | 119±68    | 106±72    | 0.028  |
| Seaweed (g)                   | 4.5±3.3   | 3.8±3.2   | 0.004  | 5±3.6     | 5.3±3.8  | 0.446  | 4.5±3.3  | 4.6±3.9   | 0.600  | 6±3.9     | 5.6±5.2   | 0.032  |
| Fish/Seafood (g)              | 74±47     | 64±44     | 0.003  | 81±46     | 89±51    | 0.131  | 63±36    | 57±37     | 0.074  | 87±41     | 76±37     | 0.007  |
| Meat/Processed Meat (g)       | 86±52     | 97±55     | 0.006  | 68±43     | 73±45    | 0.232  | 79±46    | 86±52     | 0.289  | 60±34     | 60±37     | 0.763  |
| Eggs (g)                      | 30±21     | 29±22     | 0.843  | 27±18     | 28±19    | 0.639  | 23±14    | 28±18     | 0.101  | 25±17     | 23±14     | 0.258  |
| Soybeans/Soy products (g)     | 61±44     | 53±41     | 0.007  | 65±42     | 64±43    | 0.539  | 65±42    | 62±43     | 0.662  | 74±41     | 64±40     | 0.006  |
| Milk/Dairy product (g)        | 125±111   | 116±109   | 0.164  | 149±104   | 147±116  | 0.458  | 138±100  | 122±90    | 0.120  | 158±91    | 139±106   | 0.004  |
| Milk (g)                      | 76±100    | 72±95     | 0.988  | 95±87     | 93±95    | 0.610  | 81±79    | 71±78     | 0.288  | 94±77     | 88±93     | 0.115  |
| Other dairy products (g)      | 48±41     | 44±41     | 0.052  | 54±43     | 54±44    | 0.694  | 57±41    | 51±43     | 0.073  | 64±47     | 51±37     | 0.007  |
| Sugar (g)                     | 5.5±4.3   | 5.4±4.8   | 0.227  | 8.5±6     | 8.8±6.4  | 0.711  | 6.7±4.2  | 6.5±4.6   | 0.445  | 10.4±5.7  | 9.3±5.7   | 0.018  |
| Nuts and seeds (g)            | 3.6±5.6   | 2.8±5.1   | 0.005  | 3.6±6     | 4.2±8.7  | 0.088  | 4.4±6.1  | 2.7±5.5   | 0.010  | 4.1±6     | 3±4.6     | 0.111  |
| Fats and oils (g)             | 12.7±7.9  | 13.2±7.7  | 0.351  | 12±7.6    | 11.4±7.2 | 0.325  | 12±8.5   | 12.7±7.7  | 0.181  | 10.7±6.9  | 10.8±7    | 0.982  |
| Seasonings and spices (g)     | 22.7±12.6 | 23.5±12.1 | 0.267  | 23.3±12.2 | 26±14.1  | 0.049  | 18.2±8.8 | 19.5±11.3 | 0.394  | 20.6±10.5 | 20.5±10.5 | 0.914  |
| Sweets (g)                    | 42±44     | 53±42     | <0.001 | 42±39     | 52±43    | 0.005  | 49±35    | 61±44     | 0.012  | 44±36     | 53±43     | 0.014  |
| Sugar-sweetened beverages (g) | 46±103    | 66±126    | <0.001 | 40±110    | 53±92    | <0.001 | 18±42    | 37±93     | 0.006  | 13±41     | 13±35     | 0.068  |
| Alcoholic beverages (g)       | 147±157   | 110±158   | <0.001 | 123±146   | 143±166  | 0.363  | 27±59    | 32±76     | 0.994  | 21±59     | 13±40     | 0.179  |

Differences in the continuous and categorical variables were analyzed by Mann-Whitney U tests.

### **Supplemental list of participants**

Koichi Iwasaki, Iwasaki Medical Clinic, Yamaguchi, Japan

Kazuhiro Miyazawa, Miyazawa Clinic, Hokkaido, Japan

Osamu Tomonaga, Tomonaga Clinic, Tokyo, Japan

Katsuya Yamazaki, Kawai Clinic, Ibaraki, Japan

Noriharu Yagi, Yagi Internal Medicine Clinic, Okinawa, Japan

Masae Minami, Minami Masae Internal Medicine Clinic, Fukuoka, Japan

Hideki Wakamatsu, Wakamatsu Internal Medicine Clinic, Akita, Japan

Hidekatsu Sugimoto, Sugimoto Clinic, Kitakyushu, Japan

Tomohiro Iizumi, Iizumi Internal Medicine Clinic, Ibaraki, Japan

Masato Takaki, Takaki Internal Medicine Clinic, Niigata, Japan

Hiroshi Takeda, Takeda Clinic, Kanagawa, Japan

Akira Okada, Okada Internal Medicine Clinic, Fukuoka, Japan

Nobuichi Kuribayashi, Misaki Internal Medicine Clinic, Chiba, Japan

Michiko Tyousa, Wakamatsu Kinen Hospital, Kagoshima, Japan

Akiko Hosokawa, Hikari Clinic, Nara, Japan

Fuminobu Okuguchi, Okuguchi Clinic of internal medicine, Miyagi, Japan

Keiko Arai, Arai Clinic, Yokohama, Japan

Mikihiko Kudo, Kudo Internal Medicine Clinic, Aomori, Japan

Masahiro Iwamoto, Iwamoto Internal Medicine Clinic, Kagawa, Japan

Hiroshi Takamura, Takamura Internal Medicine Clinic, Tokyo, Japan

Mariko Oishi, Oishi Internal Medicine Clinic, Kyoto, Japan

Hiroaki Seino, Seino Internal Medicine Clinic, Fukushima, Japan

Tetsuya Moriai, Megumino Hospital, Hokkaido, Japan
